# Supplementary material
Source: publisher figshare collection journal article supplement (https://acs.figshare.com/ndownloader/files/26040785)
Supplement: Supplementary file 1 [file 26040785]

**Magnetic flower-like Fe-doped CoO nanocomposites with dual enzyme-like activities for facile and sensitive determination of H<sub>2</sub>O<sub>2</sub> and dopamine**

**Jiajia Lian<sup>a</sup>, Yanlei He<sup>a</sup>, Ning Li<sup>a</sup>, Pei Liu<sup>\*,b</sup>, Zhenxue Liu<sup>a</sup>, and Qingyun Liu<sup>\*,a</sup>**

<sup>a</sup> College of Chemical and Biological Engineering, Shandong University of Science and Technology, Qingdao 266590, China

<sup>b</sup> College of Chemistry and Chemical Engineering; Analysis and Testing Center, Henan Polytechnic University, Jiaozuo 454000, China.

**\* Corresponding Author**

E-mail: [qyliu@sdust.edu.cn](mailto:qyliu@sdust.edu.cn)

Tel: +86 0532 86057757

## Experimental section

### Characterizations

X-ray powder diffraction (XRD) patterns were measured on an X-ray diffractometer (Rigaku D/Max-rB) with an interval of  $0.02^\circ$  at a scanning step of  $8^\circ \text{ min}^{-1}$ . The BET specific surface area and BJH pore size distribution were determined at 77 K on a fully automatic specific surface area and porosity analyzer (MIKE Micromeritics ASAP2460) after degassing the samples at  $120^\circ \text{C}$  for 12 h. Scanning electron microscopy (SEM) images and [elemental dispersive spectroscopy \(EDS\)](#) [were determined](#) on a FEI APREO microscope operating at 20 kV. High resolution transmission electron microscopy (HRTEM) images and elemental mapping images were collected on a TEM system (FEI Tecnai G2 F20) operating at 200 kV. X-ray photoelectron spectra (XPS) were measured by using a Multifunctional imaging electron spectrometer (Thermo ESCALAB 250Xi) with Al  $K\alpha$  radiation operating at 250 W.

### Peroxidase-like activity

The peroxidase-like activity of Fe-CoO NCs was initially evaluated for TMB oxidation with  $\text{H}_2\text{O}_2$  as additive. In short, 200  $\mu\text{L}$  catalyst ( $0.3 \text{ mg mL}^{-1}$ ), 200  $\mu\text{L}$   $\text{H}_2\text{O}_2$  solution (200 mM) and 200  $\mu\text{L}$  TMB solution (1 mM) were added into 1400  $\mu\text{L}$  buffer (pH of 4.0), respectively. After reacting for 60 s at room temperature ( $25 \pm 2^\circ \text{C}$ ), the specific absorbance of oxidized TMB (ox-TMB) at 652 nm was measured on a UV-visible spectrophotometer (Persee Analytics, TU1810). The 0.15Fe-CoO NCs possessed the highest peroxidase-mimicking activity. Then, control experiments were

conducted to confirm the dual enzyme-like activities of 0.15Fe-CoO NCs. Furthermore, the influences of pH and temperature were investigated to achieve the best performance of 0.15Fe-CoO nanozymes.

### **Kinetic tests**

The steady kinetics of 0.15Fe-CoO NCs as peroxidase mimics were studied by varying the concentration of one substrate and keeping that of another a constant. The initial reaction velocity ( $v$ ) can be obtained by linear fitting the specific absorbances versus reaction times. The relationship of  $v$  against the substrate concentration ( $C$ ) should well match the typical second-order Michaelis-Menten (M-M) curve. The M-M constant ( $K_m$ ) and maximum initial reaction rate ( $V_m$ ) can be calculated from the slope and intercept of the evolved double reciprocal curve:  $v^{-1} = (K_m/V_m)C^{-1} + V_m^{-1}$ . A smaller  $K_m$  value means a higher affinity between mimics and the substrate.

### **Determination of H<sub>2</sub>O<sub>2</sub> and DA**

Based on the superior peroxidase-like activity of 0.15Fe-CoO NCs, a colorimetric sensor was developed for sensitive and selective detection of H<sub>2</sub>O<sub>2</sub> and DA. The LOD value towards H<sub>2</sub>O<sub>2</sub> was obtained by varying the H<sub>2</sub>O<sub>2</sub> from 1 to 100  $\mu$ M. The selectivity was studied in comparison with various interferences which has **ten times higher concentration than** that of H<sub>2</sub>O<sub>2</sub>, including metal ions, carbohydrates and amino acids. Similarly, after reacting for 60 s, DA was added into 0.15Fe-CoO+H<sub>2</sub>O<sub>2</sub>+TMB system, then immediately measuring the absorbance at 652 nm. Due to the inhibition of DA for the catalytic oxidation of TMB, the absorbance difference ( $\Delta A$ ) before and after adding DA should be linearly related with the DA

concentration within a certain range. And the sensitivity and selectivity of the proposed sensor toward DA were also investigated.

### Mechanism research

To understand the plausible catalytic mechanism of 0.15Fe-CoO NCs, fluorescence probe experiments were performed on a fluorescence spectrophotometer (HACHI, F-4600 FL) with the excitation wavelength of 315 nm. The non-fluorescent PTA easily reacts with  $\bullet\text{OH}$  to produce the highly fluorescent 2-hydroxy terephthalic acid (HTA) which has the maximum fluorescence intensity at around 432 nm. Therefore, PTA can be applied as the fluorescence probe to confirm whether the generation of  $\bullet\text{OH}$  was catalyzed by 0.15Fe-CoO NCs or not. Moreover, radical trapping experiments were performed by using IPA, PBQ, and EDTA-2Na to scavenge  $\bullet\text{OH}$ ,  $\bullet\text{O}_2^-$ , and hole ( $\text{h}^+$ ), respectively.

### Results and discussion

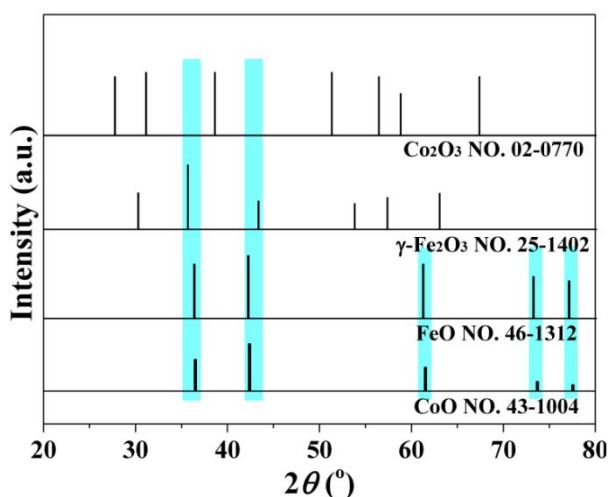

**Figure S1.** XRD standard cards of CoO, FeO, and  $\gamma\text{-Fe}_2\text{O}_3$ , and  $\text{Co}_2\text{O}_3$ .

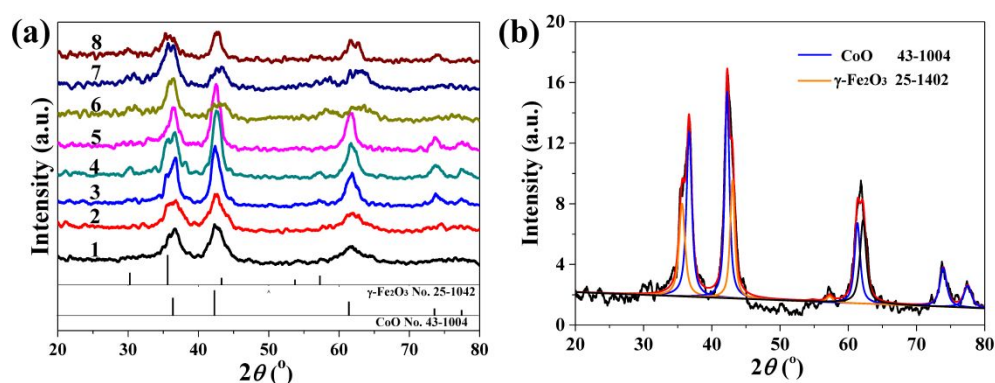

**Figure S2.** (a) XRD patterns of (1) 0.05, (2) 0.10, (3) 0.20, (4) 0.30, (5) 0.40, (6) 0.60, (7) 0.80, and (8) 1.00Fe-CoO NCs; (b) peak splitting and fitting result for the XRD pattern of 0.15Fe-CoO NCs.

**Table S1.** The ratios of peak areas due to  $\gamma$ -Fe<sub>2</sub>O<sub>3</sub> and CoO in CoO and Fe-CoO.

| No.                                      | CoO  | 0.05 | 0.1  | 0.15 | 0.2  | 0.3  | 0.4  | 0.6  | 0.8  | 1.0  |
|------------------------------------------|------|------|------|------|------|------|------|------|------|------|
| $\gamma$ -Fe <sub>2</sub> O <sub>3</sub> | 0.00 | 5.13 | 7.66 | 10.0 | 11.5 | 19.9 | 27.6 | 22.6 | 31.3 | 35.4 |
| CoO                                      | 100  | 46.1 | 40.4 | 45.8 | 36.6 | 54.4 | 55.9 | 39.5 | 42.9 | 37.4 |
| Ratio                                    | 0.00 | 0.11 | 0.19 | 0.22 | 0.31 | 0.37 | 0.49 | 0.57 | 0.73 | 0.95 |

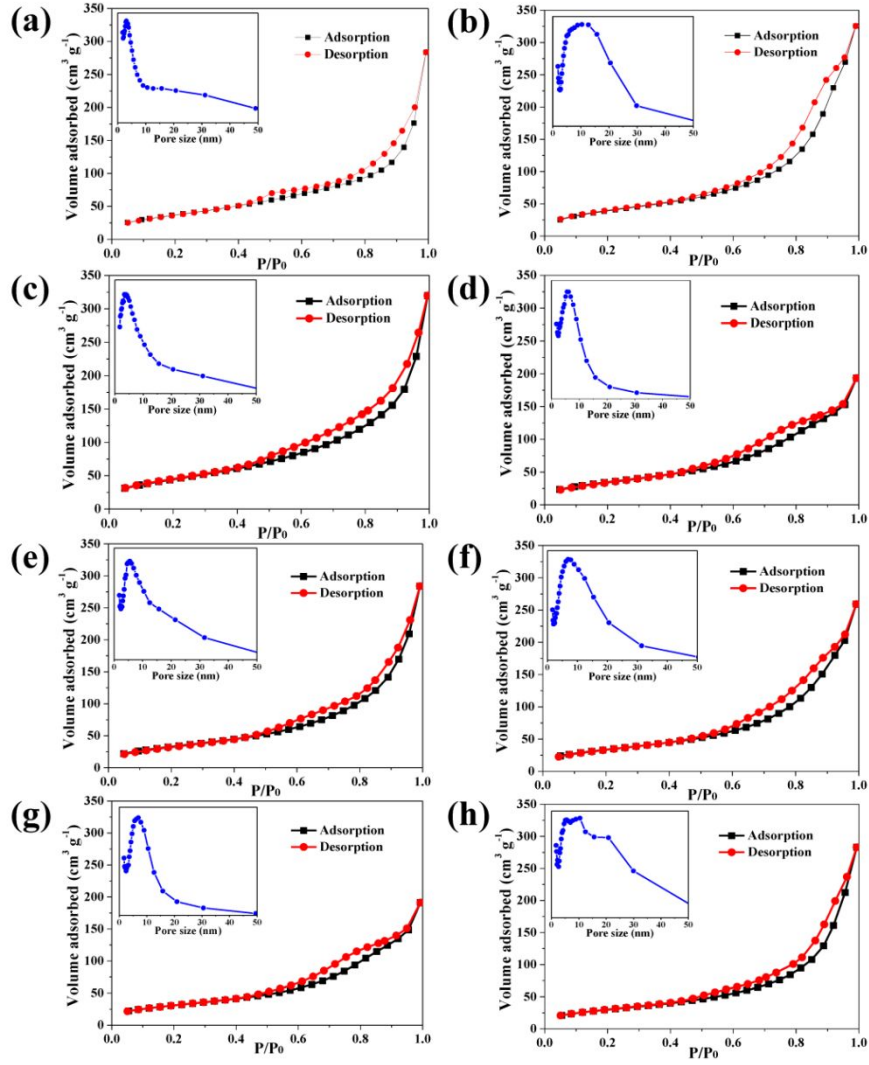

**Figure S3.** N<sub>2</sub> adsorption/desorption isotherms of (a) 0.05Fe-CoO, (b) 0.1Fe-CoO, (c) 0.20Fe-CoO, (d) 0.3Fe-CoO, (e) 0.4Fe-CoO, (f) 0.6Fe-CoO, (g) 0.8Fe-CoO, (h) 1.0Fe-CoO NCs.

**Table S2.** Specific surface area ( $A_{\text{BET}}$ ), pore volume ( $P_V$ ) and average pore size ( $P_S$ ) of CoO and Fe-CoO.

| NO.               | $A_{\text{BET}}$ (m <sup>2</sup> /g) | $P_V$ (cm <sup>3</sup> /g) | $P_S$ (nm)     |
|-------------------|--------------------------------------|----------------------------|----------------|
| CoO               | 216.1638                             | 0.882486                   | 14.4553        |
| 0.05Fe-CoO        | 139.0821                             | 0.444407                   | 11.8825        |
| 0.10Fe-CoO        | 146.5244                             | 0.504599                   | 12.4933        |
| <b>0.15Fe-CoO</b> | <b>205.3850</b>                      | <b>0.655105</b>            | <b>11.5848</b> |
| 0.20Fe-CoO        | 166.1699                             | 0.500521                   | 11.0423        |
| 0.30Fe-CoO        | 129.1306                             | 0.30397                    | 8.4357         |
| 0.40Fe-CoO        | 124.1001                             | 0.44052                    | 12.8422        |
| 0.60Fe-CoO        | 123.5661                             | 0.404191                   | 11.7936        |
| 0.80Fe-CoO        | 113.6521                             | 0.299565                   | 9.5858         |
| 1.00Fe-CoO        | 110.6212                             | 0.440364                   | 14.4259        |

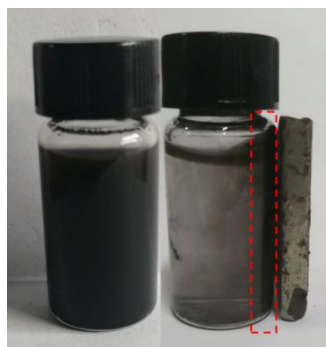

**Figure S4.** The suspension of 0.15Fe-CoO NCs after ultrasound for 5min (left) and the corresponding state after applying a magnet for 30 min (right).

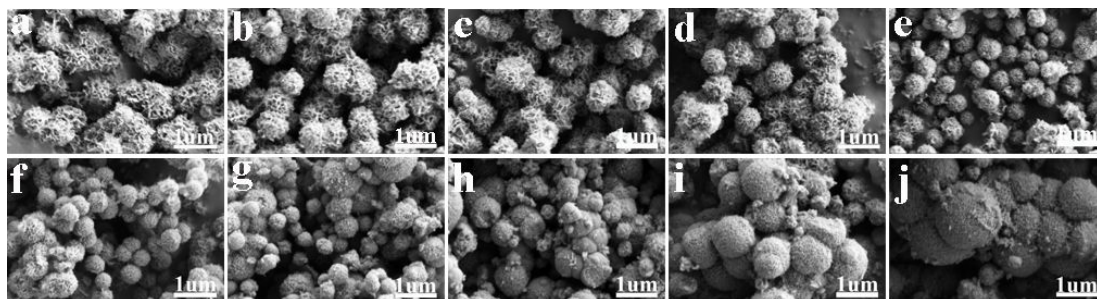

**Figure S5.** SEM photos of (a) CoO, (b) 0.05, (c) 0.10, (d) 0.15, (e) 0.20, (f) 0.30, (g) 0.40, (h) 0.60, (i) 0.80, and (j) 1.00Fe-CoO NCs.

**Table S3.** Surface atomic ratios (at.%) of Fe/Co on CoO and Fe-CoO determined by EDS.

| No.       | CoO  | 0.05 | 0.1  | 0.15 | 0.2  | 0.3  | 0.4  | 0.6  | 0.8  | 1.0  |
|-----------|------|------|------|------|------|------|------|------|------|------|
| Fe (at.%) | 0.00 | 11.5 | 16.1 | 18.4 | 22.1 | 25.9 | 29.7 | 40.0 | 45.5 | 49.1 |
| Co (at.%) | 100  | 88.5 | 83.9 | 81.6 | 77.9 | 74.1 | 70.3 | 60.0 | 54.5 | 50.9 |
| Fe/Co (%) | 0.00 | 0.13 | 0.19 | 0.23 | 0.28 | 0.35 | 0.42 | 0.67 | 0.83 | 0.97 |

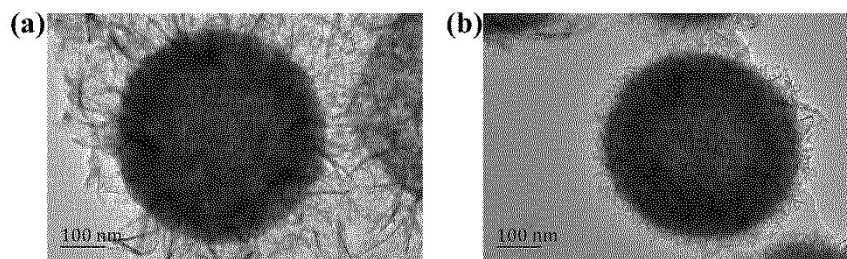

**Figure S6.** TEM photos of single CoO NP and 0.15Fe-CoO NP.

**Table S4.** Atomic ratios (at.%) of surface elements on CoO and 0.15Fe-CoO measured by XPS.

| No.        | Fe <sup>3+</sup> | Fe <sup>2+</sup> | Co <sup>3+</sup> | Co <sup>2+</sup> | O <sub>α</sub> | O <sub>β</sub> | O <sub>γ</sub> |
|------------|------------------|------------------|------------------|------------------|----------------|----------------|----------------|
| CoO        | 0                | 0                | 24.9             | 75.1             | 43.2           | 29.0           | 27.8           |
| 0.15Fe-CoO | 59.5             | 40.5             | 21.1             | 78.9             | 53.0           | 37.3           | 9.7            |

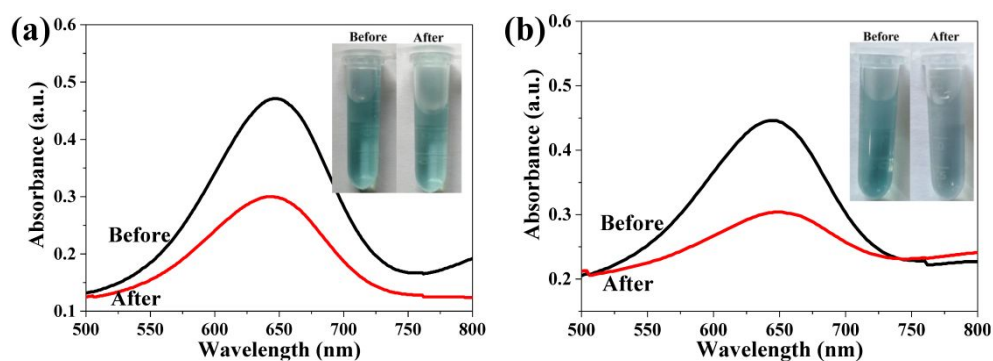

**Figure S7.** Catalytic oxidation of TMB by (a) CoO NPs and (b) 0.15Fe-CoO NCs without H<sub>2</sub>O<sub>2</sub> after high-purity N<sub>2</sub> was continuously purged before reaction.

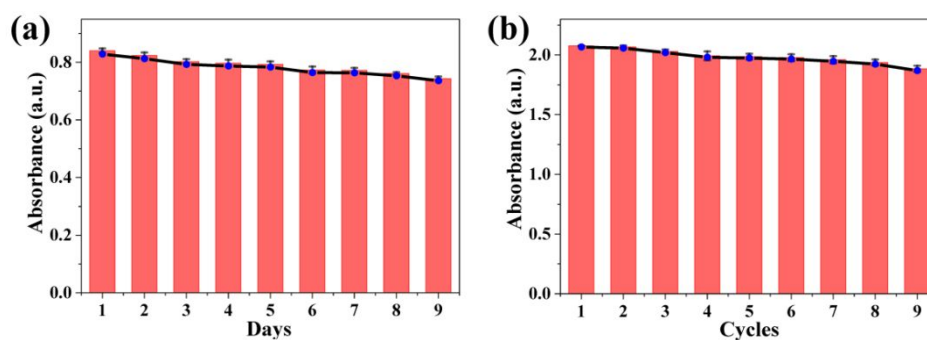

**Figure S8.** (a) Durability and (b) repeatability performance of 0.15Fe-CoO NCs as peroxidase mimics.



**Table S5.** Comparison of kinetic parameters of 0.15Fe-CoO, HRP and other peroxidase mimics.

| No.                                     | H <sub>2</sub> O <sub>2</sub> |                                                       | TMB                 |                                                       | Ref.      |
|-----------------------------------------|-------------------------------|-------------------------------------------------------|---------------------|-------------------------------------------------------|-----------|
|                                         | K <sub>m</sub> (mM)           | V <sub>m</sub> ( $\times 10^{-8}$ M s <sup>-1</sup> ) | K <sub>m</sub> (mM) | V <sub>m</sub> ( $\times 10^{-8}$ M s <sup>-1</sup> ) |           |
| 0.15Fe-CoO NCs                          | 11.2                          | 24.1                                                  | 0.170               | 50.9                                                  | This work |
| HRP                                     | 3.70                          | 8.71                                                  | 0.434               | 10.0                                                  | 1         |
| Fe <sub>3</sub> O <sub>4</sub> MNPs     | 154                           | 9.78                                                  | 0.098               | 3.44                                                  | 1         |
| WS <sub>2</sub> NSs                     | 15.2                          | 65.2                                                  | 0.805               | 22.0                                                  | 2         |
| Au <sub>21</sub> Pd <sub>79</sub> NCs   | 5.89                          | 8.19                                                  | 0.295               | 19.7                                                  | 3         |
| Pd NPs/meso-C                           | 58.0                          | —                                                     | 0.130               | —                                                     | 4         |
| Cu-Ag/rGO NCs                           | 8.62                          | 7.02                                                  | 0.634               | 4.26                                                  | 5         |
| KFePW <sub>12</sub> O <sub>40</sub> NPs | 165                           | 6.9                                                   | 0.346               | 3.7                                                   | 6         |

**Table S6.** Comparison of the analytical parameters for H<sub>2</sub>O<sub>2</sub> sensing with published reports.

| Samples                                                 | Method          | Time/s | Linear range/ $\mu$ M | LOD/ $\mu$ M | Ref.      |
|---------------------------------------------------------|-----------------|--------|-----------------------|--------------|-----------|
| 0.15Fe-CoO NCs                                          | Colorimetric    | 60     | 6–20                  | 4.40         | This work |
| CePO <sub>4</sub> -CeO <sub>2</sub> NRs                 | Colorimetric    | 240    | 5–150                 | 2.90         | 7         |
| Au-Hg/rGO NCs                                           | Colorimetric    | 60     | 5–100                 | 3.25         | 8         |
| NiFe-LDHNS                                              | Colorimetric    | 600    | 10–500                | 4.40         | 9         |
| Au/Co <sub>3</sub> O <sub>4</sub> -CeO <sub>x</sub> NCs | Colorimetric    | 180    | 10–100                | 5.29         | 10        |
| FePt-Au HNPs                                            | Colorimetric    | 180    | 20–700                | 12.33        | 11        |
| Au@Ag NRs                                               | Colorimetric    | 600    | 10–10000              | 6.00         | 12        |
| MOF-808                                                 | Colorimetric    | 1800   | 10–15000              | 4.50         | 13        |
| Te@PEDOT NCs                                            | Colorimetric    | 600    | 10–100                | 4.83         | 14        |
| rGO/Cu <sub>8</sub> S <sub>5</sub> /PPy NSs             | Fluorescence    | —      | 0–20                  | 0.688        | 15        |
| FeS (NNs)/GCE                                           | Electrochemical | —      | 5–140                 | 4.30         | 16        |
| FeSe (NSs)/GCE                                          | Electrochemical | —      | 5–100                 | 3.00         | 16        |

**Table S7.** Comparison of the analytical parameters for DA sensing with published reports.

| Samples                                                 | Method          | Time/s | Linear range/ $\mu\text{M}$ | LOD/ $\mu\text{M}$ | Ref.      |
|---------------------------------------------------------|-----------------|--------|-----------------------------|--------------------|-----------|
| 0.15Fe-CoO NCs                                          | Colorimetric    | 60     | 2–10                        | 1.99               | This work |
| Co <sub>3</sub> O <sub>4</sub> @NiO NTs                 | Colorimetric    | 400    | 1–20                        | 1.21               | 17        |
| CuS-BSA-Cu <sub>3</sub> (PO <sub>4</sub> ) <sub>2</sub> | Colorimetric    | 1200   | 0.05–100                    | 0.13               | 18        |
| Cys-AgInZnS QDs                                         | Fluorescence    | –      | 15–120                      | 0.65               | 19        |
| ZnO@Cys NPs                                             | Fluorescence    | –      | 26.3–68.5                   | 0.79               | 20        |
| Pdots@AMP-Cu                                            | Fluorescence    | –      | 10–400                      | 4.00               | 21        |
| Au/RGO/GCE                                              | Electrochemical | –      | 6.8–41                      | 1.40               | 22        |
| PtTi NPs/GCE                                            | Electrochemical | –      | 4–500                       | 3.20               | 23        |
| ENA/ITO                                                 | Electrochemical | –      | 0.25–20                     | 0.228              | 24        |
| UiO-66-NH <sub>2</sub> @P(ANI-co-ANA)/GCE               | Electrochemical | –      | 10–110                      | 0.30               | 25        |

## References

- (1) Gao, L.; Zhuang, J.; Nie, L.; Zhang, J.; Zhang, Y.; Gu, N.; Wang, T.; Feng, J.; Yang, D.; Perrett, S.; Yan, X. Intrinsic peroxidase-like activity of ferromagnetic nanoparticles. *Nat. Nanotechnol.* **2007**, *2* (9), 577-583.
- (2) Tang, Y.; Hu, Y.; Yang, Y.; Liu, B.; Wu, Y. A facile colorimetric sensor for ultrasensitive and selective detection of Lead(II) in environmental and biological samples based on intrinsic peroxidase-mimic activity of WS<sub>2</sub> nanosheets. *Anal. Chim. Acta* **2020**, *1106*, 115-125.
- (3) Cai, S.; Fu, Z.; Xiao, W.; Xiong, Y.; Wang, C.; Yang, R. Zero-dimensional/two-dimensional Au<sub>x</sub>Pd<sub>100-x</sub> nanocomposites with enhanced nanozyme catalysis for sensitive glucose detection. *ACS Appl. Mater. Interfaces* **2020**, *12* (10), 11616-11624.
- (4) Zhang, W.; Niu, X.; Li, X.; He, Y.; Song, H.; Peng, Y.; Pan, J.; Qiu, F.; Zhao, H.; Lan, M. A smartphone-integrated ready-to-use paper-based sensor with mesoporous carbon-dispersed Pd nanoparticles as a highly active peroxidase mimic for H<sub>2</sub>O<sub>2</sub> detection. *Sensor. Actuat. B: Chem.* **2018**, *265*, 412-420.
- (5) Darabdhara, G.; Sharma, B.; Das, M.; Boukherroub, R.; Szunerits, S. Cu-Ag bimetallic nanoparticles on reduced graphene oxide nanosheets as peroxidase mimic for glucose and ascorbic acid detection. *Sensor. Actuat. B: Chem.* **2017**, *238*, 842-851.
- (6) Zeb, A.; Sahar, S.; Qazi, U.; Odda, A.; Ullah, N.; Liu, Y.; Qazic, I.; Xu, A.

Intrinsic peroxidase-like activity and enhanced photo-Fenton reactivity of iron-substituted polyoxometallate nanostructures. *Dalton Trans.* **2018**, 47, 7344-7352.

(7) Vinothkumar, G.; Lalitha, A.; Suresh Babu, K. Cerium phosphate-cerium oxide heterogeneous composite nanozymes with enhanced peroxidase-like biomimetic activity for glucose and hydrogen peroxide sensing. *Inorg. Chem.* **2019**, 58 (1), 349-358.

(8) Kong, F.; Yao, L.; Lu, X.; Li, H.; Wang, Z.; Fang, H.; Wang, W. Au-Hg/rGO with enhanced peroxidase-like activity for sensitive colorimetric determination of H<sub>2</sub>O<sub>2</sub>. *Analyst* **2020**, 145 (6), 2191-2196.

(9) Zhan, T.; Kang, J.; Li, X.; Pan, L.; Li, G.; Hou, W. NiFe layered double hydroxide nanosheets as an efficiently mimic enzyme for colorimetric determination of glucose and H<sub>2</sub>O<sub>2</sub>. *Sensor. Actuat. B: Chem.* **2018**, 255, 2635-2642.

(10) Liu, H.; Ding, Y.; Yang, B.; Liu, Z.; Liu, Q.; Zhang, X. Colorimetric and ultrasensitive detection of H<sub>2</sub>O<sub>2</sub> based on Au/Co<sub>3</sub>O<sub>4</sub>-CeO<sub>x</sub> nanocomposites with enhanced peroxidase-like performance. *Sensor. Actuat. B: Chem.* **2018**, 271, 336-345.

(11) Ding, Y.; Yang, B.; Liu, H.; Liu, Z.; Zhang, X.; Zheng, X.; Liu, Q. FePt-Au ternary metallic nanoparticles with the enhanced peroxidase-like activity for ultrafast colorimetric detection of H<sub>2</sub>O<sub>2</sub>. *Sensor. Actuat. B: Chem.* **2018**, 259, 775-783.

(12) Han, L.; Li, C.; Zhang, T.; Lang, Q.; Liu, A. Au@Ag heterogeneous nanorods as nanozyme interfaces with peroxidase-like activity and their application for one-pot analysis of glucose at nearly neutral pH. *ACS Appl. Mater. Interfaces* **2015**, 7 (26), 14463-14470.

(13) Zheng, H.; Liu, C.; Zeng, X.; Chen, J.; Lu, J.; Lin, R.; Cao, R.; Lin, Z.; Su, J. MOF-808: A metal-organic framework with intrinsic peroxidase-like catalytic activity at neutral pH for colorimetric biosensing. *Inorg. Chem.* **2018**, 57 (15), 9096-9104.

(14) Chi, M.; Nie, G.; Jiang, Y.; Yang, Z.; Zhang, Z.; Wang, C.; Lu, X. Self-assembly fabrication of coaxial te@poly(3,4-ethylenedioxythiophene) nanocables and their conversion to Pd@poly(3,4-ethylenedioxythiophene) nanocables with a high peroxidase-like activity. *ACS Appl. Mater. Interfaces* **2016**, 8 (1), 1041-1049.

(15) Jiang, Y.; Gu, Y.; Nie, G.; Chi, M.; Yang, Z.; Wang, C.; Wei, Y.; Lu, X.

Synthesis of RGO/Cu<sub>8</sub>S<sub>5</sub>/PPy composite nanosheets with enhanced peroxidase-like activity for sensitive colorimetric detection of H<sub>2</sub>O<sub>2</sub> and phenol. *Part. Part. Syst. Char.* **2017**, *34* (3), 1600233.

(16) Dutta, A.; Maji, S.; Srivastava, D.; Mondal, A.; Biswas, P.; Paul, P.; Adhikary, B. Synthesis of FeS and FeSe nanoparticles from a single source precursor: a study of their photocatalytic activity, peroxidase-like behavior, and electrochemical sensing of H<sub>2</sub>O<sub>2</sub>. *ACS Appl. Mater. Interfaces* **2012**, *4* (4), 1919-1927.

(17) Zhu, Y.; Yang, Z.; Chi, M.; Li, M.; Wang, C.; Lu, X. Synthesis of hierarchical Co<sub>3</sub>O<sub>4</sub>@NiO core-shell nanotubes with a synergistic catalytic activity for peroxidase mimicking and colorimetric detection of dopamine. *Talanta* **2018**, *181*, 431-439.

(18) Swaidan, A.; Barras, A.; Addad, A.; Tahon, J.; Toufaily, J.; Hamieh, T.; Szunerits, S.; Boukherroub, R. Colorimetric sensing of dopamine in beef meat using copper sulfide encapsulated within bovine serum albumin functionalized with copper phosphate (CuS-BSA-Cu<sub>3</sub>(PO<sub>4</sub>)<sub>2</sub>) nanoparticles. *J. Colloid Interface Sci.* **2020**, *582* (Pt B), 732-740.

(19) Liu, Y.; He, X.; Ma, P.; Huang, Y.; Li, X.; Sun, Y.; Wang, X.; Song, D. Fluorometric detection of dopamine based on 3-aminophenylboronic acid-functionalized AgInZnS QDs and cells imaging. *Talanta* **2020**, *217*, 121081.

(20) Lin, J.; Huang, B.; Dai, Y.; Wei, J.; Chen, Y. Chiral ZnO nanoparticles for detection of dopamine. *Mater. Sci. Eng. C* **2018**, *93*, 739-745.

(21) Huang, H.; Bai, J.; Li, J.; Lei, L.; Zhang, W.; Yan, S.; Li, Y. Fluorescence detection of dopamine based on the polyphenol oxidase-mimicking enzyme. *Anal. Bioanal. Chem.* **2020**, *412* (22), 5291-5297.

(22) Wang, C.; Du, J.; Wang, H.; Zou, C.; Jiang, F.; Yang, P.; Du, Y. A facile electrochemical sensor based on reduced graphene oxide and Au nanoplates modified glassy carbon electrode for simultaneous detection of ascorbic acid, dopamine and uric acid. *Sensor. Actuat. B: Chem.* **2014**, *204*, 302-309.

(23) Zhao, D.; Yu, G.; Tian, K.; Xu, C. A highly sensitive and stable electrochemical sensor for simultaneous detection towards ascorbic acid, dopamine, and uric acid based on the hierarchical nanoporous PtTi alloy. *Biosens. Bioelectron.* **2016**, *82*,

119-126.

(24) Ding, H.; Guo, W.; Zhou, P.; Su, B. Nanocage-confined electrochemiluminescence for the detection of dopamine released from living cells. *Chem. Commun.* **2020**, 56 (59), 8249-8252.

(25) Hira, S.; Nallal, M.; Rajendran, K.; Song, S.; Park, S.; Lee, J.; Joo, S.; Park, K. Ultrasensitive detection of hydrogen peroxide and dopamine using copolymer-grafted metal-organic framework based electrochemical sensor. *Anal. Chim. Acta.* **2020**, 1118, 26-35.
